# Supplementary material
Source: PubMed Central journal article supplement (PMC5940437)
Supplement: jcsm.14.5.849s1.pdf [file jcsm.14.5.849s1.pdf]

**Table S1**—Survey results regarding quality-of-life, sleepiness, family impact, and decisional conflict for children without tonsillar hypertrophy in an upper airway clinic comparing those who had and those who had not undergone previous adenotonsillectomy.

| mean±SD                            | Previous T&A<br>(N=42) | No Previous T&A<br>(N=35) | P value |
|------------------------------------|------------------------|---------------------------|---------|
| Decisional Conflict Total          | 11.4±12.0(0-37.5)      | 9.6±18.2(0-93.75)         | 0.19    |
| DC Informed                        | 9.5±11.1(0-33.3)       | 9.8±19.4(0-100)           | 0.41    |
| DC Values                          | 11.2±13.6(0-41.7)      | 10.5±18.0(0-83.3)         | 0.42    |
| DC Support                         | 9.3±14.1 (0-50)        | 8.1±18.6 (0-100)          |         |
| DC Uncertainty                     | 14.1±17.6(0-100)       | 11.4±20.9(0-100)          | 0.24    |
| DC Effectiveness                   | 12.5±14.8(0-87.5)      | 8.8±17.8 (0-87.5)         | 0.19    |
| PSQ                                | 0.40 ± 0.30            | 0.30 ± 0.25               | 0.18    |
| OSA-18                             | 44.5 ± 20.2            | 40.5 ± 21.6               | 0.42    |
| Epworth Sleepiness Scale           | 7.8 ± 5.7              | 5.9 ± 4.8                 | 0.31    |
| Family Impact Score                |                        |                           |         |
| Negative feelings toward parenting | 6.9 ± 5.4              | 8.2 ± 4.2                 | 0.26    |
| Positive feelings toward parenting | 15.1 ± 5.1             | 12.4 ± 5.3                | 0.11    |
| Negative impact on social life     | 7.0 ± 6.5              | 4.8 ± 2.9                 | 0.71    |
| Financial impact                   | 4.5 ± 4.4              | 4.1 ± 4.7                 | 0.69    |
| Impact on marriage                 | 3.9 ± 3.0              | 3.9 ± 2.9                 | 0.98    |
| Impact on siblings                 | 4.7 ± 3.6              | 5.3 ± 3.2                 | 0.68    |
| CollaboRATE score                  | 93.5 ± 11.4            | 95.4 ± 12.2               | 0.14    |

N=number, SD=standard deviation, PedsQL= pediatric quality of life survey, PSQ = pediatric sleep questionnaire; this uses a cutoff of 0.33 to indicate high risk.
